# Supplementary material for: IRWRLDA: improved random walk with restart for lncRNA-disease association prediction
Source: PubMed Central journal article supplement (PMC5295400; doi:10.18632/oncotarget.11141), 2016-08-09
Supplement: oncotarget-07-57919-s001.pdf [file oncotarget-07-57919-s001.pdf]

## **IRWRLDA: improved random walk with restart for lncRNA-disease association prediction**

### **Supplementary Materials**

**Supplementary Table S1: Known lncRNA-disease association datasets (June-2012 Version) were downloaded from the LncRNADisease database, which was regarded as the gold standard in the cross validation. See Supplementary\_Table\_S1**

**Supplementary Table S2: Known lncRNA-disease association datasets (June-2014 Version) were downloaded from the LncRNADisease database, which was regarded as the gold standard in the cross validation. See Supplementary\_Table\_S2**

**Supplementary Table S3: LincRNA expression profiles were downloaded from UCSC Genome Bioinformatics (<http://genome.ucsc.edu/>) in October, 2012, including 21626 lincRNAs' expression profiles in 22 human tissues or cell types. See Supplementary\_Table\_S3**
